# Supplementary material
Source: publisher figshare collection journal article supplement (https://acs.figshare.com/ndownloader/files/5822232)
Supplement: Supplementary file 1 [file 5822232]

REVISED  
RECEIVED

AUG 31 1999

Kirk S. Schanze  
Senior Editor

# **Supplemental Material.**

The general synthesis of cholesterol squaraines was carried out according to Scheme 1.

**N-methyl-N-(carboxypropyl)aniline** N-methyl-N-( carboxypropyl) aniline was prepared as previously<sup>1</sup> by alkylation of N-methylaniline with ethyl-4-bromobutyrate in the presence of sodium acetate and iodine, followed by hydrolysis of the ester product in 5% KOH.

**1-Chloro-2-(p-dibutylanilino)cyclobutene-3,4-dione** was prepared by Friedel-Crafts acylation of N,N dibutylaniline with 1,2 dichlorocyclobutene-3,4- dione in methylene chloride with AlCl<sub>3</sub> as a catalyst. The procedure described by Chen<sup>1</sup> et. al. was followed, except that the product was isolated by flash chromatography using chloroform as eluent.

**1-(p-Dibutylanilino)-2-hydroxycyclobutene-3,4-dione** was prepared following the procedure of Chen<sup>1</sup> by hydrolysis of the above chlorodione with a 18 % HCl solution. The product was isolated by gradient column chromatography changing the eluent from chloroform to chloroform: methanol (1:1) and finally to methanol.

**(S)-N-methyl-N-(cholesteryl-4-butanoate)aniline** The (S) ester was prepared according to a literature procedure<sup>2</sup>: 0.5 g N-methyl-N-( carboxypropyl) aniline ( 2.59 mmol) in 15 ml CH<sub>2</sub>Cl<sub>2</sub> was placed in a round bottom flask and the resulting solution stirred. 0.158 g (1.295 mmol) dimethylaminopyridine and 1 g (2.59 mmol) cholesterol were added. After the mixture was cooled to 0 °C, 0.587 g (2.85 mmol) dicyclohexylcarbodiimide was added. The mixture was stirred for five minutes at 0 °C and then overnight at 20 °C. The

mixture was filtered. The solvent in the filtrate was evaporated. The ester product was isolated by column chromatography using methylene chloride as eluent. Yield: 0.5 g, 15 %.  $^1\text{H}$  (NMR)  $\delta$  (ppm): 7.26 (m, 2H), 6.72 (m, 3H), 5.41 (m, 1H), 4.64 (broad m, 1H), 3.40 (t, 2H), 2.96 (s, 3H), 2.35- 0.68 (m, 43H).

**(S)-para-(N-methyl-N-(cholesteryl-4-butanoate)amino) phenyl (N,N-di-butyl-amino)phenylsquaraine (1).** The squaraine was prepared according to a literature procedure<sup>3</sup>. 0.45 g cholesteryl ester dissolved in 10 ml isopropanol and 0.12g (0.4 mmol) squaric acid derivative. The mixture was refluxed for five hours in the presence of 0.52 g (2.25 mmol, 0.6 ml) tributyl orthoformate under an inert atmosphere (  $\text{N}_2$ ). The mixture was cooled and filtered. The dark blue precipitate was washed with an excess of cold isopropanol and dried in a vacuum desiccator overnight. The product was purified by column chromatography, using ( $\text{CHCl}_3$ : acetone= 60: 1). Yield : 15%.  $^1\text{H}$  NMR ( $\text{CDCl}_3$ )  $\delta$  (ppm ): 8.40 ( dd, 4H), 6.78 (dd, 4H), 5.45 (m,1H), 4.65 (m, 1H), 3.58 (t, 2H), 3.46 (t, 2H), 3.17 (s, 3H), 2.38- 0.7 (m, 59H). UV- VIS:  $\lambda_{\text{max}}$  ( $\text{CHCl}_3$ ): 634 nm. Melting point: (decomp., 180°C).

## References

1. Chen, H. J.; Herkstroeter, W. G.; Perlstein, J.; Law, K.-Y.; Whitten, D. G. *J. Phys. Chem.* **1994**, *98*, 5138.
2. Newcome, G. R. *J. Am. Chem. Soc.* **1990**, *112*, 8458.
3. Law, K. Y.; Bailey, F. C. *Can. J. Chem.* **1993**, *71*, 494.
